# Supplementary material for: Aβ43‐producing PS1 FAD mutants cause altered substrate interactions and respond to γ‐secretase modulation
Source: PubMed Central journal article supplement (PMC6945062; doi:10.15252/embr.201947996), 2019-11-25

**B**

| RO7019009 | A $\beta$ 42<br>(Rel. to DMSO-treated) |      |      |      | A $\beta$ 40<br>(Rel. to DMSO-treated) |      |      |      | A $\beta$ 38<br>(Rel. to DMSO-treated) |      |      |      |
|-----------|----------------------------------------|------|------|------|----------------------------------------|------|------|------|----------------------------------------|------|------|------|
|           | DMSO                                   | 1    | 1    | 1    | 1                                      | 1    | 1    | 1    | 1                                      | 1    | 1    | 1    |
| 50 nM     | 0.51                                   | 0.34 | 0.31 | 0.50 | 0.83                                   | 0.61 | 0.64 | 0.72 | 2.64                                   | 3.83 | 3.67 | 3.08 |
| 250 nM    | 0.41                                   | 0.14 | 0.23 | 0.23 | 0.62                                   | 0.26 | 0.24 | 0.36 | 4.48                                   | 6.25 | 6.35 | 5.61 |
| 500 nM    | 0.22                                   | 0.08 | 0.16 | 0.22 | 0.31                                   | 0.18 | 0.13 | 0.34 | 7.34                                   | 6.75 | 7.05 | 5.80 |

**C**

| RO7019009<br>[lg(M)] | A $\beta$ 38<br>(% from vehicle-treated) |       |       | A $\beta$ 40<br>(% from vehicle-treated) |      |       | A $\beta$ 42<br>(% from vehicle-treated) |      |       |
|----------------------|------------------------------------------|-------|-------|------------------------------------------|------|-------|------------------------------------------|------|-------|
| -10.3345             | 98.9                                     | 100.5 | 102.2 | 91.5                                     | 99.7 | 102.5 | 91.3                                     | 100  | 102.7 |
| -9.5563              | 108.7                                    | 106.3 | 110   | 95.8                                     | 97.1 | 106.5 | 90.9                                     | 95.5 | 101.3 |
| -8.77815             | 125.1                                    | 129.7 | 130.2 | 96.4                                     | 94.8 | 112.2 | 83.9                                     | 82.5 | 96.4  |
| -8                   | 183.4                                    | 188.8 | 191   | 76.3                                     | 62.1 | 83.2  | 54.7                                     | 49.3 | 67.5  |
| -7.22185             | 264                                      | 229.7 | 312.9 | 37.3                                     | 29.8 | 39.2  | 19.2                                     | 20.6 | 27.7  |
| -6.4437              | 374.8                                    | 383.3 | 449.7 | 12.8                                     | 10.8 | 13.1  | 2.1                                      | n.d. | n.d.  |
| -5.66555             | 389.7                                    | 545   | 425.2 | 4.6                                      | 4.1  | 4.5   | n.d.                                     | n.d. | n.d.  |

**D**

| RO7019009<br>[lg(M)] | A $\beta$ 42 (H4/sw)<br>(% from vehicle-treated) |      |      |      |       |       | A $\beta$ 42 (N2a/sw)<br>(% from vehicle-treated) |      |       |       |       |      | RO7019009<br>[lg(M)] | A $\beta$ 42 (HEK293/sw)<br>(% from vehicle-treated) |      |       | RO7019009<br>[lg(M)] | Notch1<br>(% from vehicle-treated) |       |
|----------------------|--------------------------------------------------|------|------|------|-------|-------|---------------------------------------------------|------|-------|-------|-------|------|----------------------|------------------------------------------------------|------|-------|----------------------|------------------------------------|-------|
|                      | 80.5                                             | 84.4 | 96.1 | 102  | 99.6  | 100   | 105.6                                             | 89.8 | 140.1 | 145.9 | 108.9 | 71.8 |                      | 91.3                                                 | 100  | 102.7 |                      | -8.5                               | 103.6 |
| -10.505              | 97.4                                             |      |      |      |       |       |                                                   |      |       |       |       |      | -10.3345             | 91.3                                                 | 100  | 102.7 | -8.5                 | 103.6                              | 102.9 |
| -9.89791             | 80.5                                             | 84.4 | 96.1 | 102  | 99.6  | 100   | 105.6                                             | 89.8 | 140.1 | 145.9 | 108.9 | 71.8 | -9.5563              | 90.9                                                 | 95.5 | 101.3 | -8                   | 103.7                              | 107.5 |
| -9.39794             | 77.8                                             | 75.6 | 84.9 | 88   | 98.9  | 100.8 | 92.5                                              | 91.0 | 93.3  | 94.8  | 64.7  | 62.6 | -8.77815             | 83.9                                                 | 82.5 | 96.4  | -7.5                 | 97.1                               | 114   |
| -8.89794             | 59.1                                             | 54.5 | 83.6 | 83.3 | 101.1 | 88    | 53.1                                              | 43.4 | 58.1  | 84.4  | 39.5  | 51.4 | -8                   | 54.7                                                 | 49.3 | 67.5  | -7                   | 101.1                              | 101.2 |
| -8.39794             | 37.2                                             | 35.6 | 48.5 | 60.1 | 60.6  | 69.1  | 42.4                                              | 41.5 | 27.8  | 32.4  | 15.3  | 17.9 | -7.22185             | 19.2                                                 | 20.6 | 27.7  | -6.5                 | 94.9                               | 98.8  |
| -7.89794             | 15.4                                             | 14.2 | 20.7 | 28.2 | 28.7  | 42.1  | 18.0                                              | 15.5 | 4.9   | 5.8   | 7.7   | 6.0  | -6.4437              | 2.1                                                  | n.d. | n.d.  | -6                   | 101.1                              | 95.6  |
| -7.39794             | 10.9                                             | 10.1 | 12.1 | 8.9  | 6.2   | 12.3  | 7.9                                               | 8.7  | 2.1   | 3.4   | 3.8   | 5.7  |                      |                                                      |      |       | -5.5                 | 104.8                              | 95.9  |
| -6.89794             | 3                                                | 2.7  | 3.8  | 2.7  | 1.5   | 3.3   | 5.7                                               | 5.2  | 3.4   | 4.6   | 3.8   | 2.5  |                      |                                                      |      |       | -5                   | 94.2                               | 83.6  |
| -6.39794             | 1.4                                              | 1.3  | 1    | 1.2  | 0.6   | 1.2   | 3.3                                               | 4.5  | 3.4   | 4.6   | 2.6   | 4.1  |                      |                                                      |      |       |                      |                                    |       |

**E**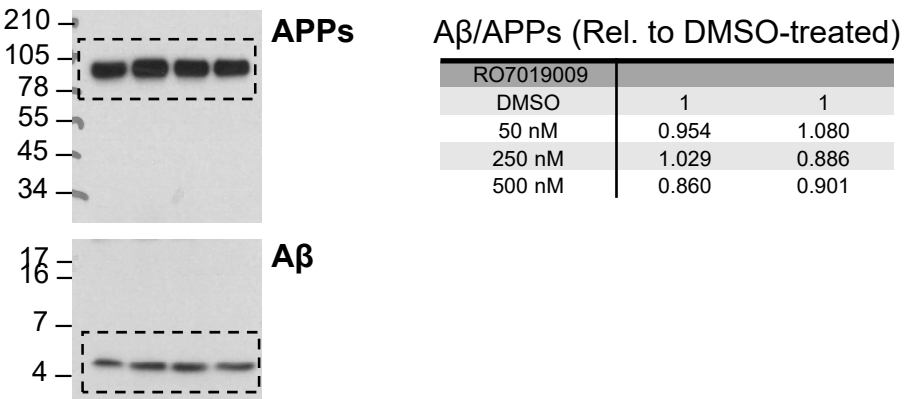**F**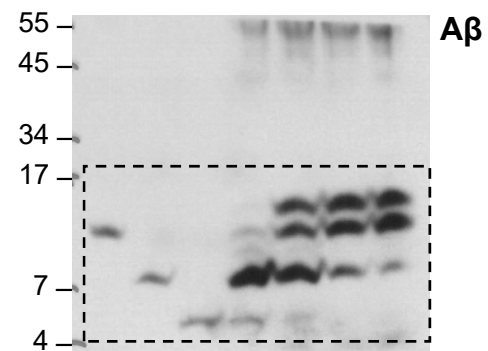

Supplement: EMBR-21-e47996-s006.pdf [file EMBR-21-e47996-s006.pdf]
