# Supplementary material for: Aβ43‐producing PS1 FAD mutants cause altered substrate interactions and respond to γ‐secretase modulation
Source: PubMed Central journal article supplement (PMC6945062; doi:10.15252/embr.201947996), 2019-11-25
Supplement: EMBR-21-e47996-s002.pdf [file EMBR-21-e47996-s002.pdf]

## Expanded View Figures

**Figure EV1. Modulation of selected PS1 FAD mutants with different classes of GSMs.**

- A Structure of GSM-1.
- B Structure of RO-02.
- C, D ELISA of A $\beta$  species in conditioned media of HEK293/sw cells overexpressing WT or PS1 L166P and R278I mutants treated with GSM-1 (C), RO-02 (D), or vehicle (DMSO) showing the secretion of A $\beta$ 38, A $\beta$ 40, A $\beta$ 42, and A $\beta$ 43 compared to total A $\beta$  (A $\beta$ 38 + A $\beta$ 40 + A $\beta$ 42 + A $\beta$ 43) ( $n = 2$  biological replicates). Data are presented as mean.

Source data are available online for this figure.

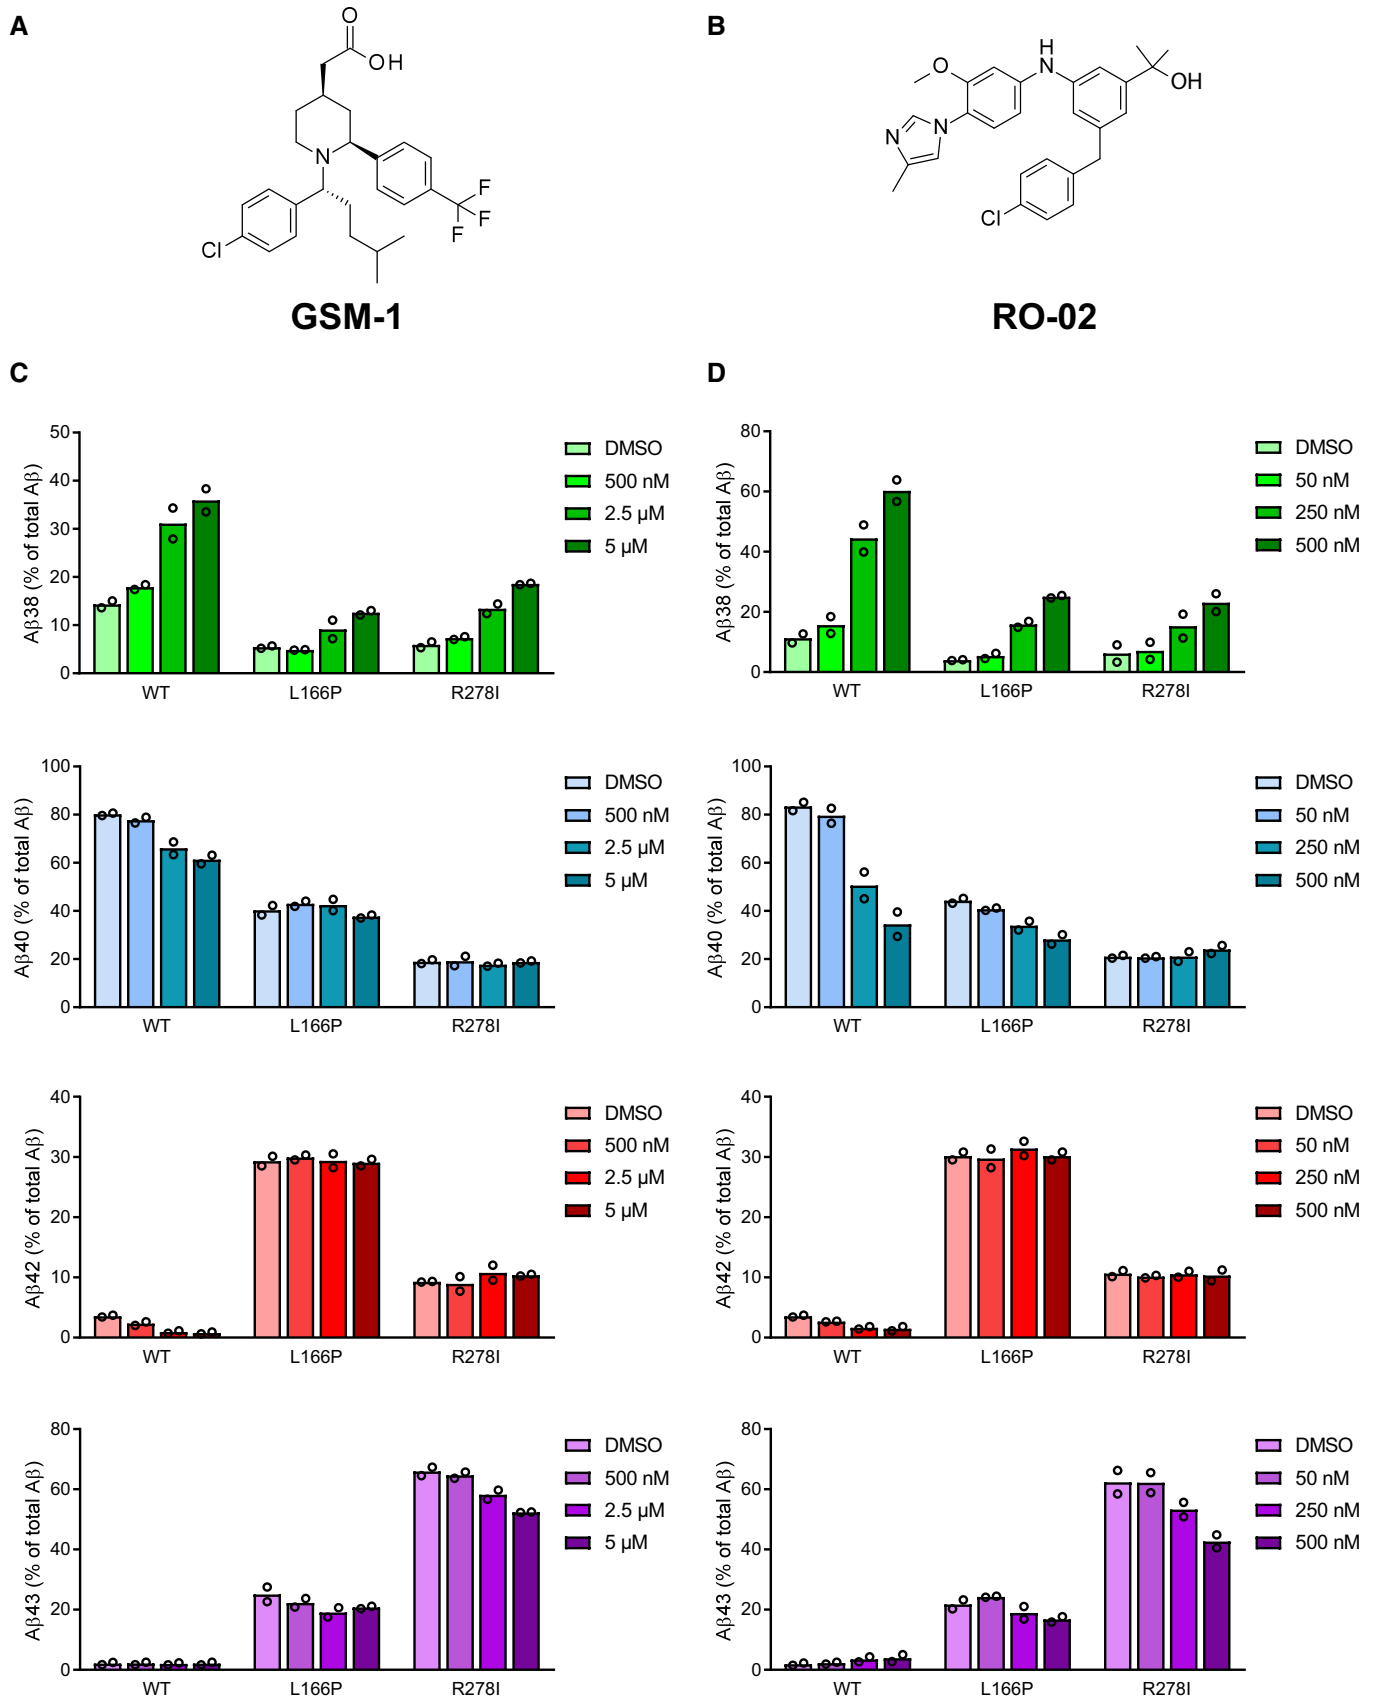

Figure EV1.

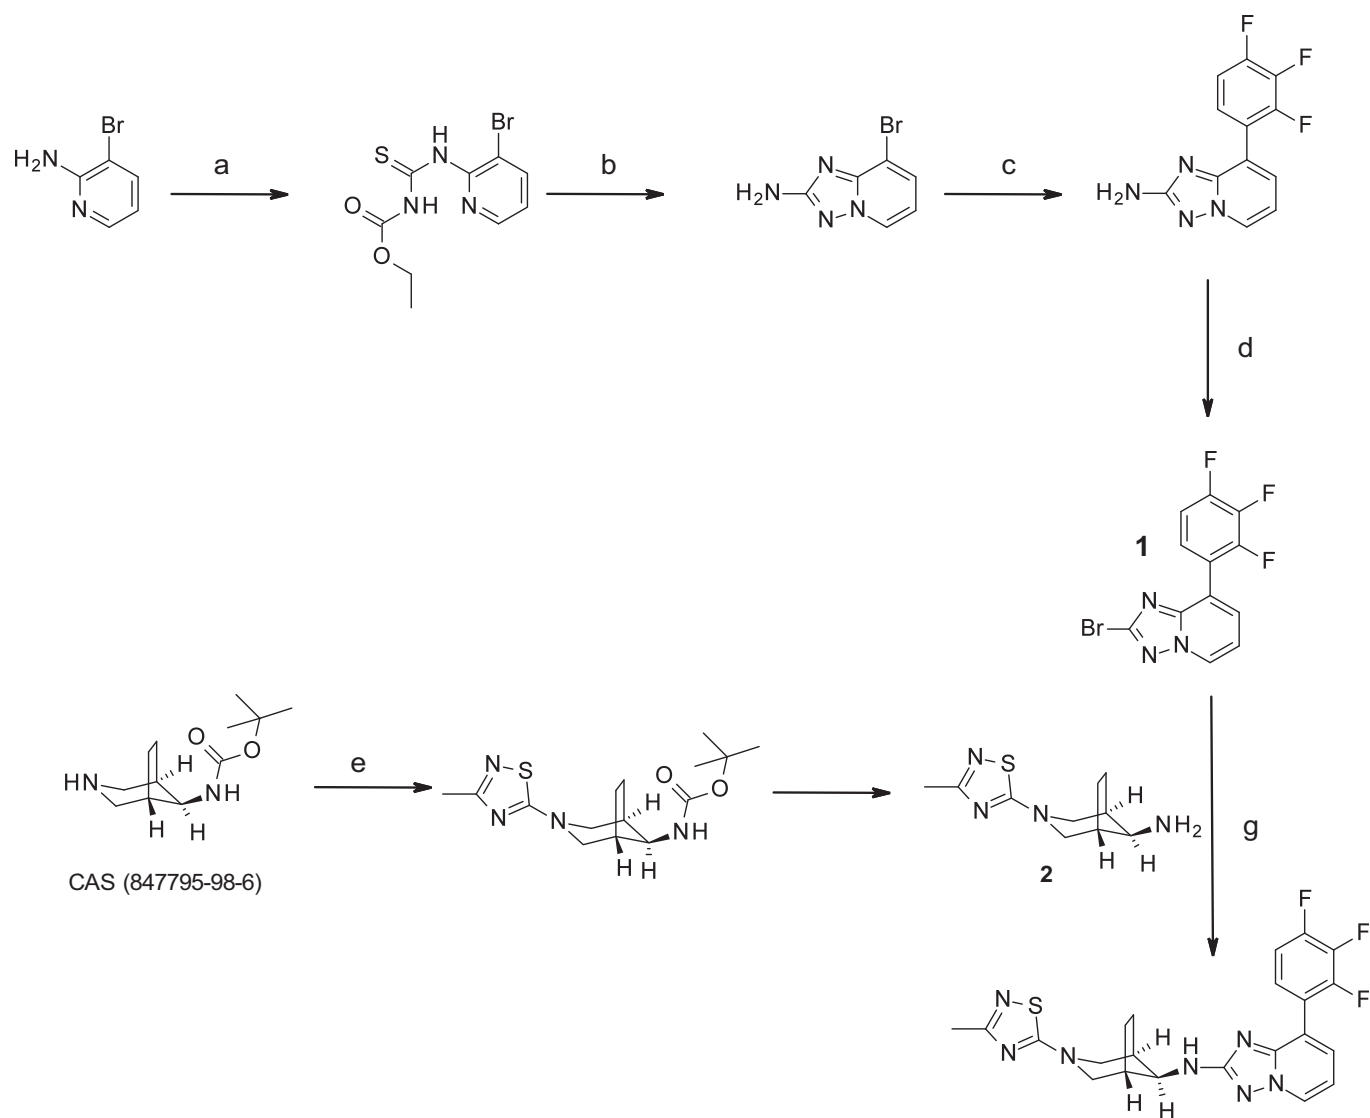

**Figure EV2. Synthesis of RO7019009.**

Schematic overview of the steps of the RO7019009 synthesis. Reagents and conditions: a)  $\text{EtO}_2\text{CNCs}$  (1.1 equiv), dioxane, room temperature, 3 h, quant.; b)  $\text{NH}_2\text{OH}\cdot\text{HCl}$  (5 equiv),  $i\text{-Pr}_2\text{NEt}$  (3 equiv),  $\text{MeOH}/\text{EtOH}$  (1/1), room temperature to  $60^\circ\text{C}$ , 4 h, 94%; c) 2,3,4-trifluorophenylboronic acid (1.3 equiv),  $\text{Cs}_2\text{CO}_3$  (2 equiv),  $\text{PdCl}_2(\text{DPPF})$   $\text{CH}_2\text{Cl}_2$  (0.1 equiv), dioxane/ $\text{H}_2\text{O}$  (10/1),  $100^\circ\text{C}$ , overnight, 82%; d) tert-butyl nitrite (1.5 equiv),  $\text{Cu}(\text{II})\text{Br}_2$  (1.5 equiv), acetonitrile,  $75^\circ\text{C}$ , 2 h, 87%; e) 5-chloro-3-methyl-[1,2,4] thiazazole (1.2 equiv),  $\text{Et}_3\text{N}$  (1.5 equiv),  $\text{EtOH}$ ,  $80^\circ\text{C}$ , overnight, 97%; f) TFA (10 equiv),  $\text{CH}_2\text{Cl}_2$ , room temperature, overnight, 94%; g) intermediate 2 (1 equiv), sodium phenoxide (1.6 equiv), xantphos (0.16 equiv),  $\text{Pd}_2\text{dbaCHCl}_3$  (0.08 equiv),  $145^\circ\text{C}$ , 45 min in microwave, 57%.

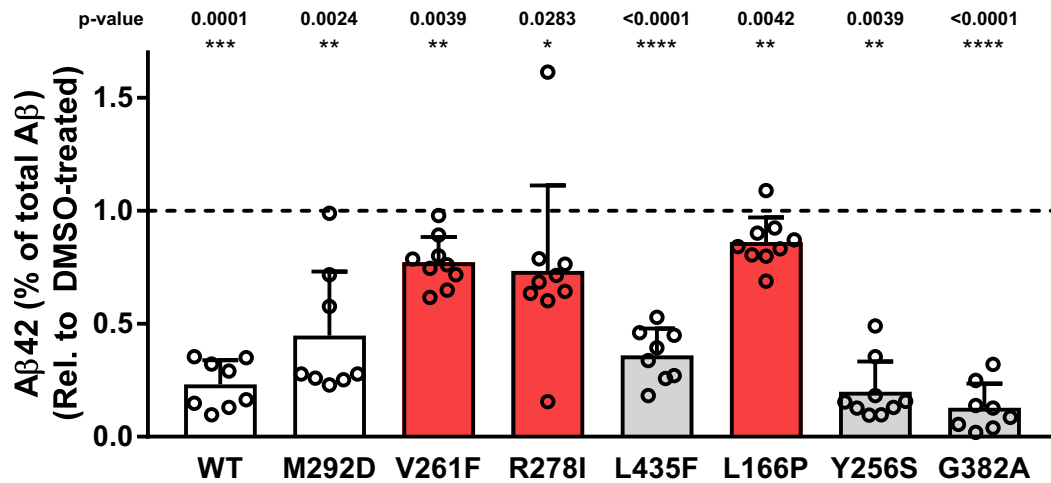

**Figure EV3. Aβ<sub>42</sub>-lowering effects of RO7019009 on refractory PS1 FAD mutants.**

ELISA of Aβ species in conditioned media of HEK293/sw cells overexpressing WT or mutant PS1 treated with 500 nM RO7019009 or vehicle (DMSO) showing the secretion of Aβ<sub>42</sub> compared to total Aβ (Aβ<sub>38</sub> + Aβ<sub>40</sub> + Aβ<sub>42</sub> + Aβ<sub>43</sub>) (n = 9; including data taken from Fig 4C (n = 5) and 4 additional experiments, data are presented as mean ± SD). Statistical significance was tested using paired t-test. In case of the V261F and the Y256S mutant, the data were not normally distributed and were therefore assessed using Wilcoxon matched-pairs signed rank test.

Source data are available online for this figure.

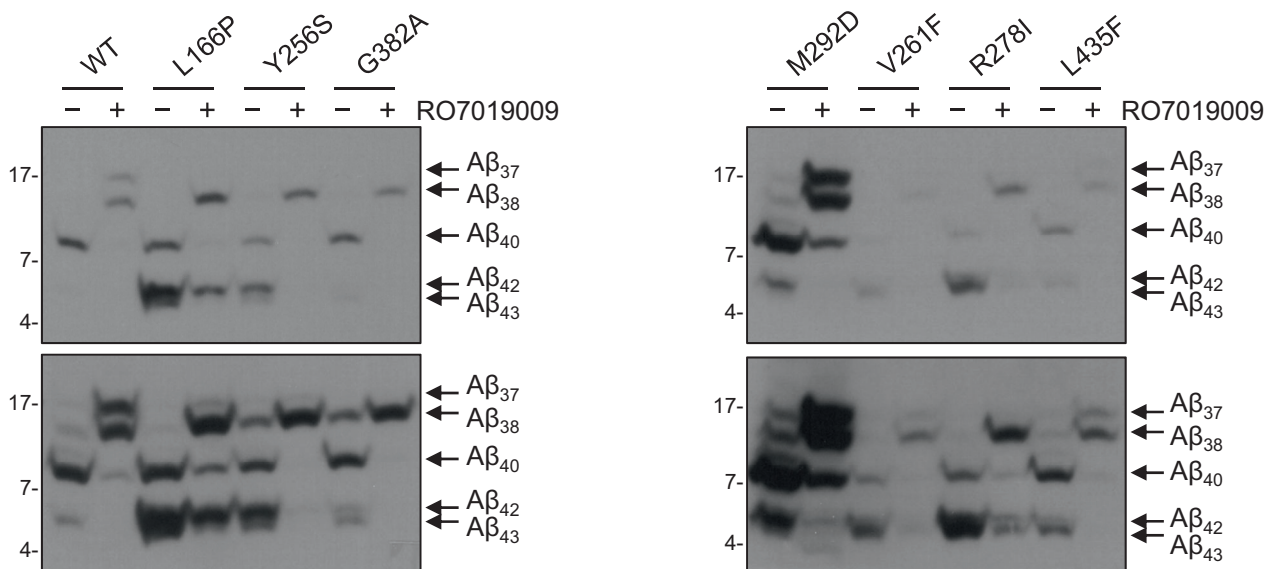

**Figure EV4. Modulation of Aβ profiles of PS1 FAD mutants by RO7019009.**

Immunoblot analysis of Aβ species in conditioned media of HEK293/sw cells overexpressing WT or mutant PS1 treated with 500 nM RO7019009 or vehicle (DMSO) after separation by Tris–Bicine urea SDS–PAGE.

Source data are available online for this figure.

**Figure EV5. RO7019009 maintains activity toward CHAPSO-solubilized  $\gamma$ -secretase.**

- A Sandwich immunoassay of short A $\beta$  species (A $\beta$ 37 + A $\beta$ 38) generation from recombinant APP C100-His<sub>6</sub> substrate by CHAPSO-solubilized  $\gamma$ -secretase of HEK293/sw cells overexpressing WT or mutant PS1 in the presence of RO7019009 or vehicle (DMSO) ( $n = 3$  biological replicates).
- B Immunoblot analysis of AICD generation from recombinant APP C100-His<sub>6</sub> substrate by CHAPSO-solubilized  $\gamma$ -secretase of HEK293/sw cells overexpressing WT or mutant PS1 in the presence of RO7019009, L-685,458 (5  $\mu$ M), or vehicle (DMSO).
- C Quantitation of AICD generation in (B) ( $n = 4$ –5 biological replicates).

Data information: Data in (A) and (C) are presented as mean  $\pm$  SD.

Source data are available online for this figure.

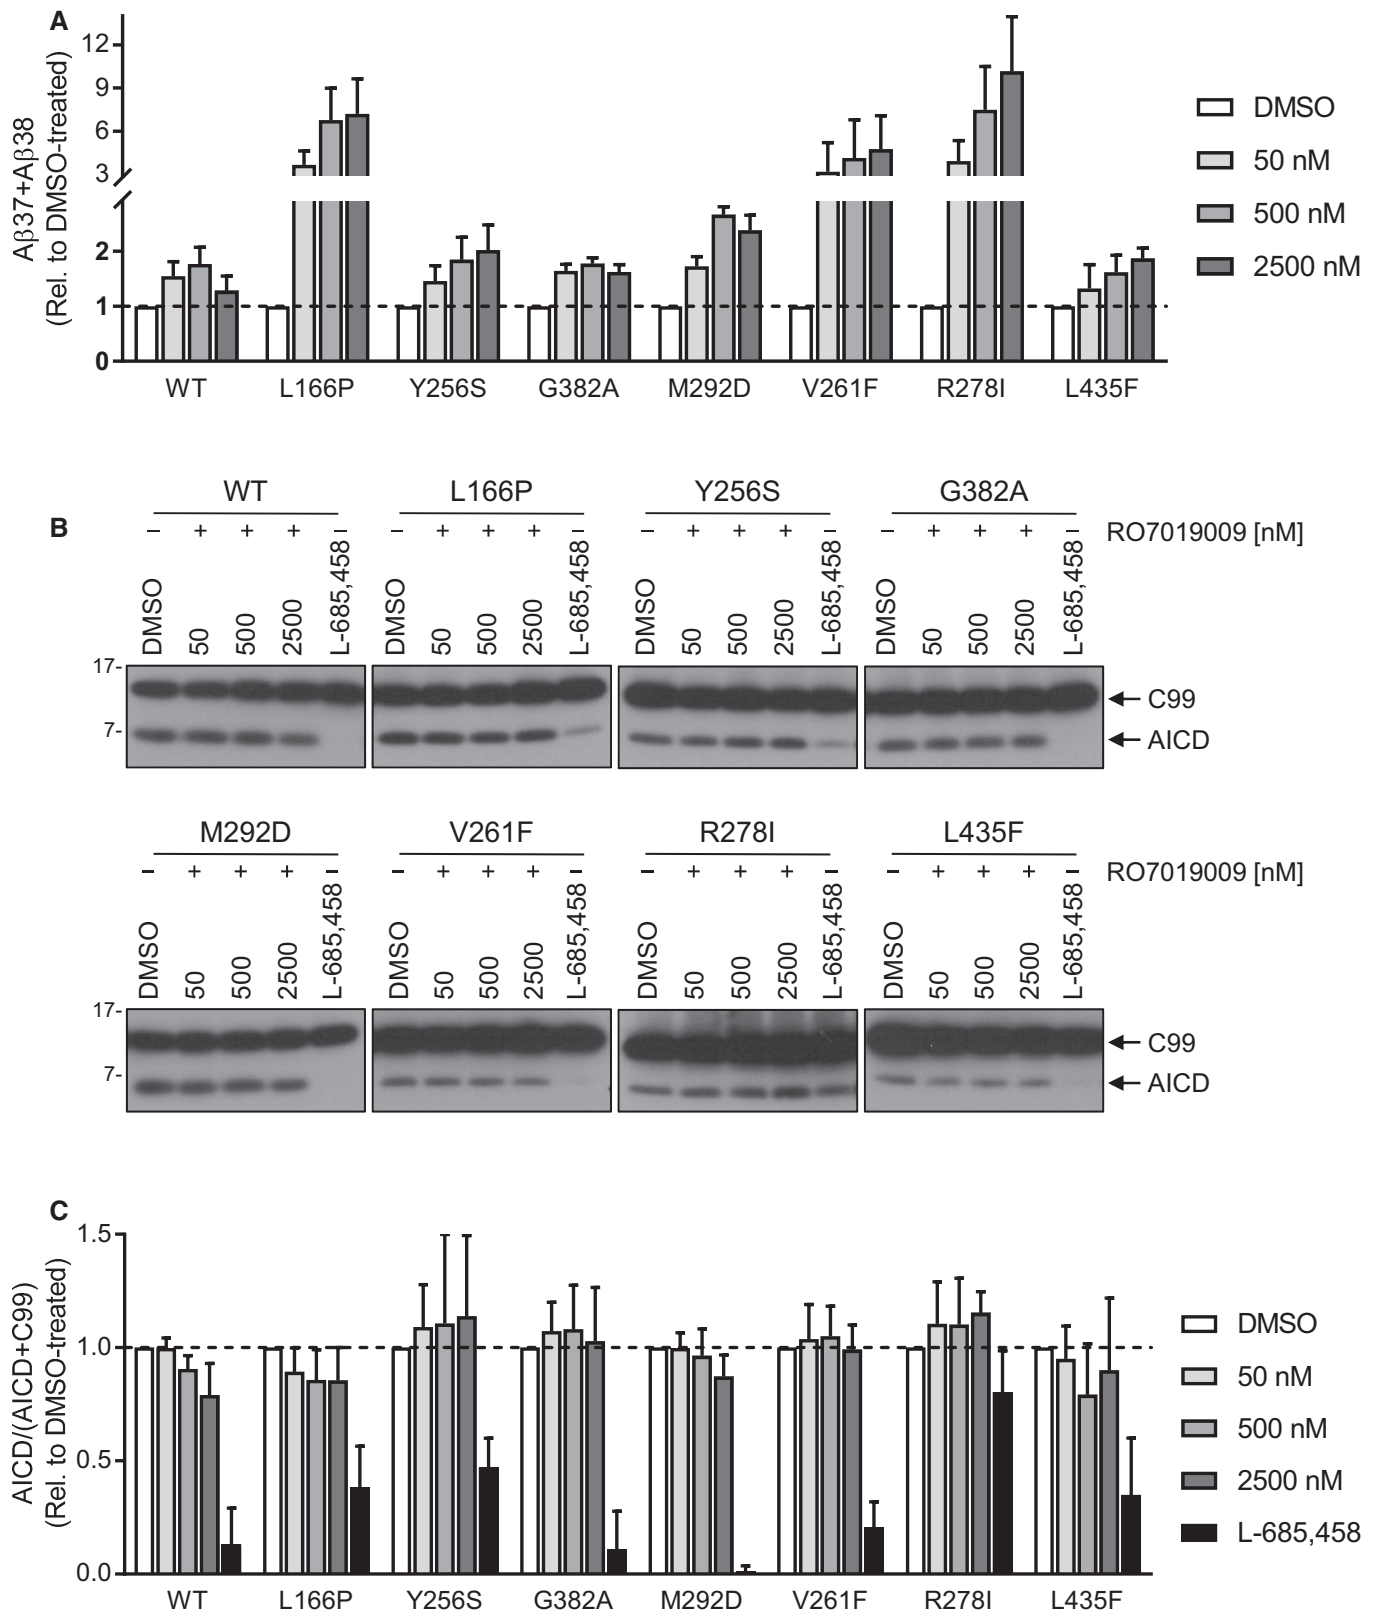

Figure EV5.
