# Supplementary material for: Aβ43‐producing PS1 FAD mutants cause altered substrate interactions and respond to γ‐secretase modulation
Source: PubMed Central journal article supplement (PMC6945062; doi:10.15252/embr.201947996), 2019-11-25
Supplement: EMBR-21-e47996-s004.pdf [file EMBR-21-e47996-s004.pdf]

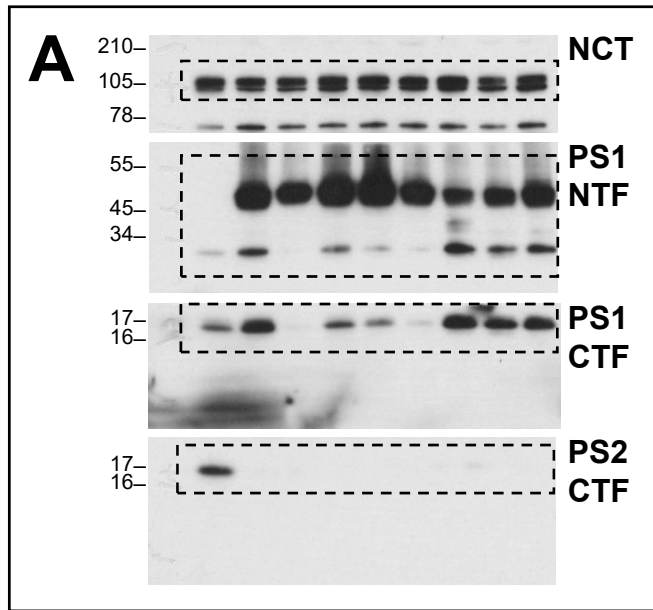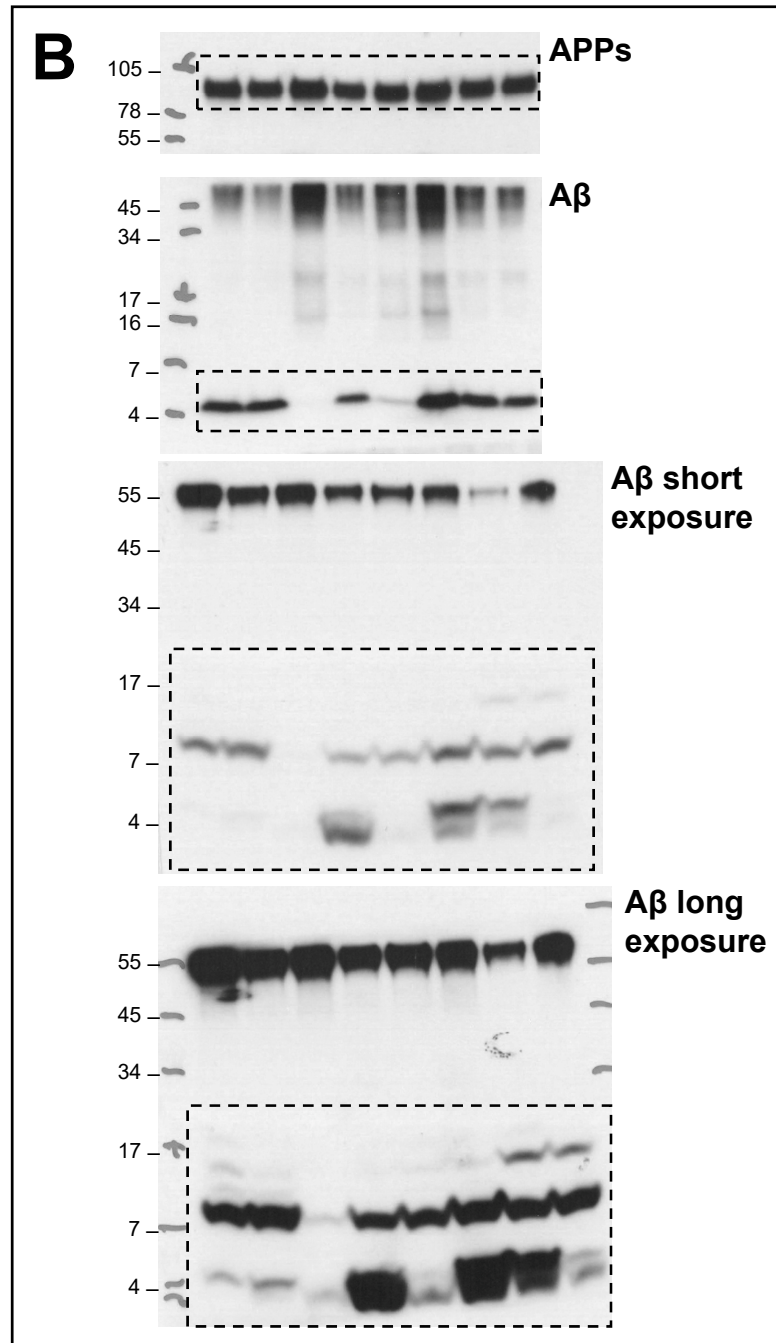

Source Data Figure 1
