# Supplementary material for: Aβ43‐producing PS1 FAD mutants cause altered substrate interactions and respond to γ‐secretase modulation
Source: PubMed Central journal article supplement (PMC6945062; doi:10.15252/embr.201947996), 2019-11-25
Supplement: EMBR-21-e47996-s005.pdf [file EMBR-21-e47996-s005.pdf]

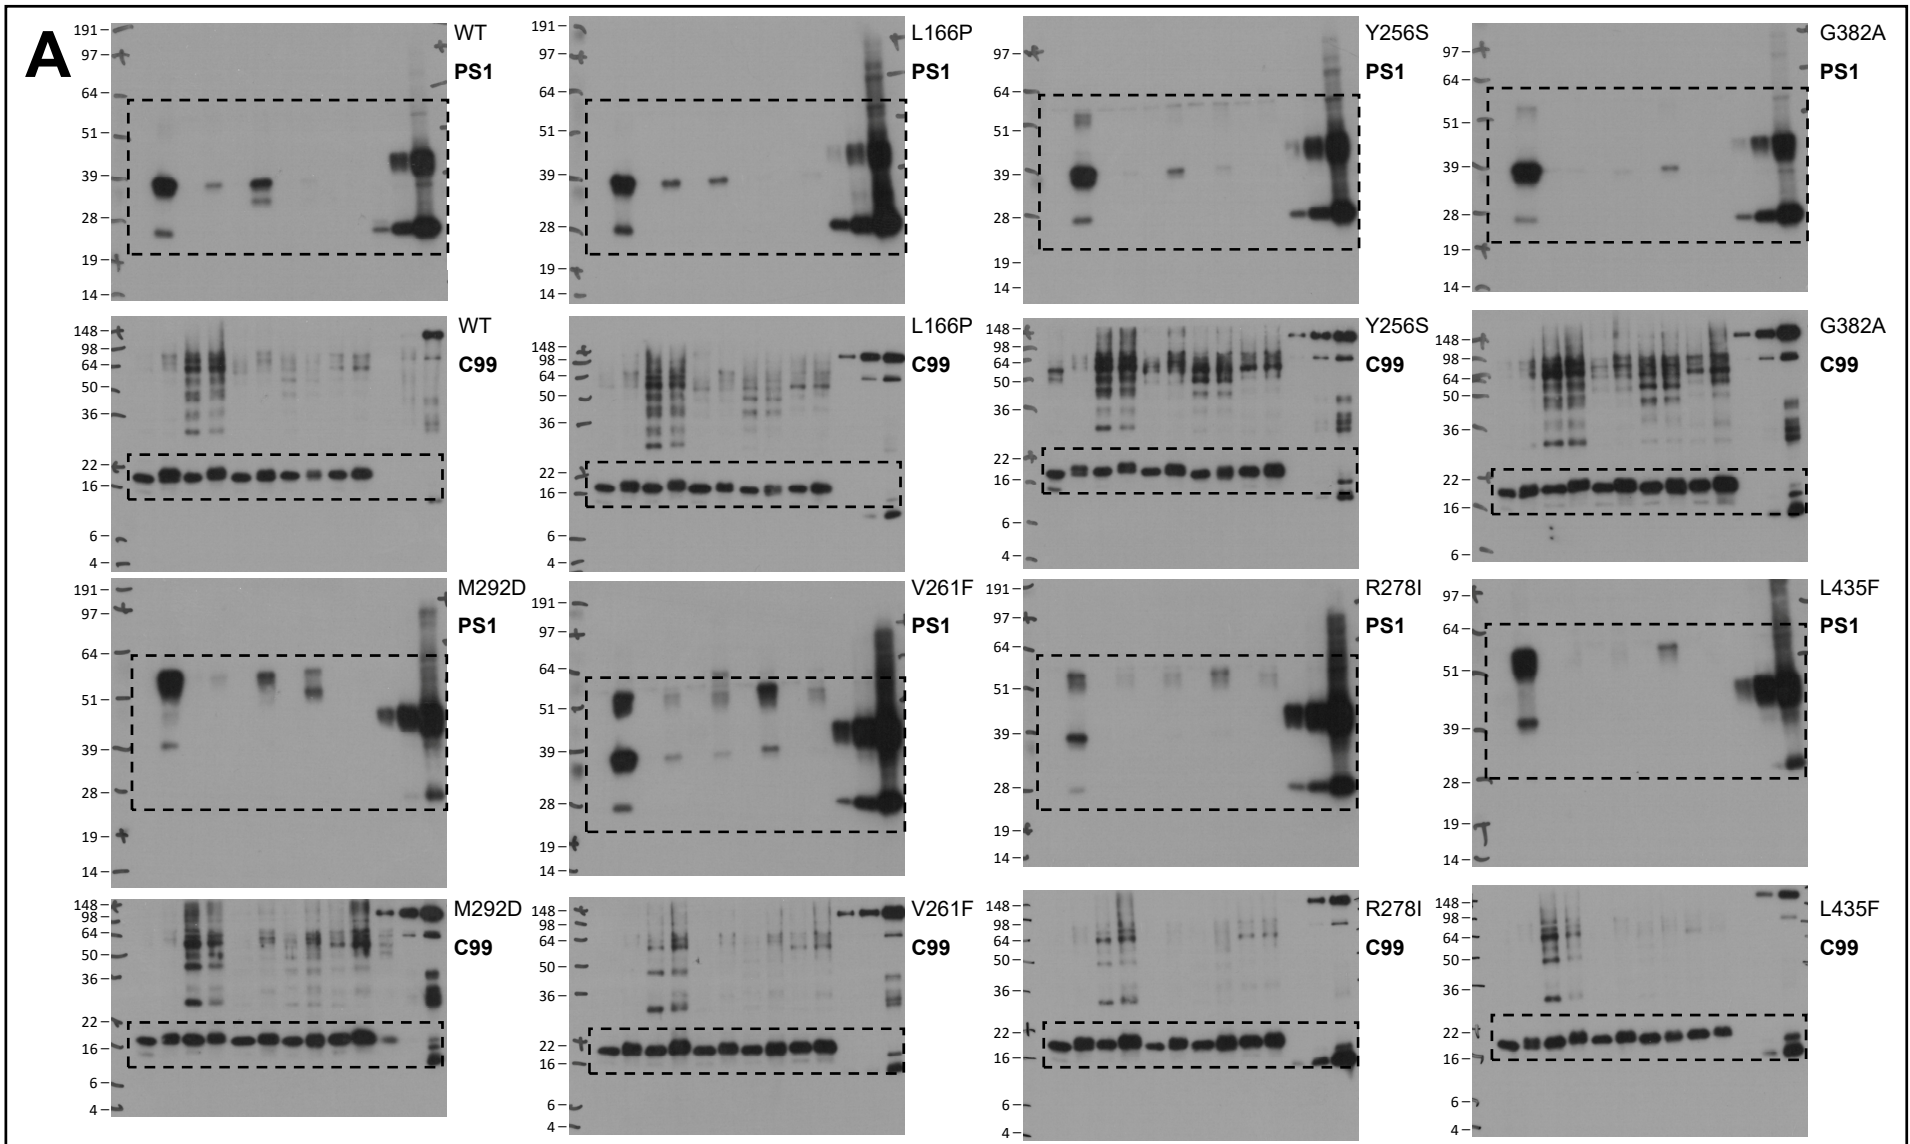

**B**

|       | CL efficiency T48/L49<br>(Change from CTRL) [lg] |        |        |        |       |        |
|-------|--------------------------------------------------|--------|--------|--------|-------|--------|
|       | WT                                               | 0      | 0      | 0      | 0     | 0      |
| WT    |                                                  |        |        |        |       |        |
| L166P |                                                  | 1.053  | 0.620  | 0.423  | 0.915 | 0.673  |
| Y256S |                                                  | 0.019  | -0.393 | -0.338 | 0.100 | -0.710 |
| G382A |                                                  | -0.035 | 0.174  | 0.378  | 0.369 |        |
| M292D |                                                  | 0      | 0      | 0      | 0     |        |
| V261F |                                                  | 0.352  | 0.568  | 1.137  | 0.001 |        |
| R278I |                                                  | 0.171  | 0.224  | 0.239  | 0.656 |        |
| L435F |                                                  | 0.797  | 0.476  | 0.956  | 0.381 |        |

**C**

|       | CL efficiency K54/V44<br>(Change from CTRL) [lg] |        |        |        |        |       |
|-------|--------------------------------------------------|--------|--------|--------|--------|-------|
|       | WT                                               | 0      | 0      | 0      | 0      | 0     |
| WT    |                                                  |        |        |        |        |       |
| L166P |                                                  | 0.420  | 0.451  | 0.673  | 0.641  | 0.428 |
| Y256S |                                                  | 0.132  | -0.256 | 0.346  | -0.159 | 0.066 |
| G382A |                                                  | -0.134 | -0.309 | -0.102 | -0.264 |       |
| M292D |                                                  | 0      | 0      | 0      | 0      |       |
| V261F |                                                  | 0.460  | 0.286  | 0.857  | 0.141  |       |
| R278I |                                                  | 0.576  | 0.768  | 1.120  | 0.523  |       |
| L435F |                                                  | -0.058 | 0.306  | 0.850  | -0.105 |       |

Source Data Figure 2
