# Supplementary material for: Aβ43‐producing PS1 FAD mutants cause altered substrate interactions and respond to γ‐secretase modulation
Source: PubMed Central journal article supplement (PMC6945062; doi:10.15252/embr.201947996), 2019-11-25
Supplement: EMBR-21-e47996-s007.pdf [file EMBR-21-e47996-s007.pdf]

### A A $\beta$ 38 (% of total A $\beta$ )

|       | DMSO |      |      |      |      | 50 nM RO7019009 |      |      |      |      | 250 nM RO7019009 |      |      |      |      | 500 nM RO7019009 |      |      |      |      |
|-------|------|------|------|------|------|-----------------|------|------|------|------|------------------|------|------|------|------|------------------|------|------|------|------|
| WT    | 9.8  | 11.4 | 12.6 | 4.8  | 4.3  | 30.5            | 42.9 | 35.3 | 37   | 33.6 | 65.1             | 67.3 | 70.2 | 70.5 | 53.7 | 93.2             | 79.1 | 78.7 | 82.6 | 77.8 |
| M292D | 7.4  | 29.8 | 8.8  | 2.1  | 2.1  | 32.5            | 24   | 27   | 22.5 | 20.3 | 47.8             | 51.8 | 61.2 | 59.2 | 54.4 | 74.4             | 66.6 | 74.1 | 72.7 | 67.5 |
| V261F | 15   | n.d. | n.d. | 1.2  | 1    | 33.5            | 34   | 25.1 | 16   | 18.1 | 60.7             | 54   | 41.1 | 47.4 | 43.6 | 68               | 55.7 | 51.7 | 63.8 | 60.4 |
| R278I | n.d. | n.d. | n.d. | 1.1  | 0.2  | 22.2            | 19.7 | 18.4 | 22.1 | 20.5 | 47.5             | 48   | 44.2 | 53.1 | 53.9 | 58.7             | 63.1 | 59.9 | 68.2 | 66.4 |
| L435F | 7.3  | 9.4  | 10.1 | 3.9  | 3.9  | 32.7            | 36   | 39   | 44   | 44.4 | 67               | 73.1 | 68.5 | 67.2 | 77.7 | 74.9             | 83.2 | 77.7 | 82.6 | 84.2 |
| L166P | 5.1  | n.d. | n.d. | 0.9  | 1    | 14.1            | 19.9 | 17.7 | 20.2 | 18.9 | 33.6             | 42.7 | 38.6 | 41.1 | 33.3 | 62.1             | 51.8 | 51.9 | 48.5 | 47.4 |
| Y256S | 20.4 | 18   | 16.1 | 1.5  | 15.3 | 78.4            | 78.7 | 80.1 | 74.5 | 77.6 | 88.8             | 91.4 | 91.2 | 88.7 | 89.2 | 89.6             | 92   | 94.1 | 92.4 | 93.1 |
| G382A | 29.6 | 23.6 | 23.2 | 12.2 | 12.2 | 90.2            | 85.3 | 84.8 | 85.7 | 88   | 95.7             | 95   | 94.6 | 94.3 | 94.4 | 93.4             | 98.1 | 95.1 | 94.3 | 95.3 |

### B A $\beta$ 43 (% of total A $\beta$ )

|       | DMSO |      |      |      |      | 50 nM RO7019009 |      |      |      |      | 250 nM RO7019009 |      |      |      |      | 500 nM RO7019009 |      |      |      |      |
|-------|------|------|------|------|------|-----------------|------|------|------|------|------------------|------|------|------|------|------------------|------|------|------|------|
| WT    | n.d. | 0.5  | 0.5  | 0    | 0.2  | n.d.            | 0.9  | 0.9  | 0    | 0.3  | n.d.             | 1.2  | 1    | n.d. | 0.3  | n.d.             | 0.9  | 1    | n.d. | 0.2  |
| M292D | 2.2  | 1.9  | 2.5  | 3.6  | 4.1  | 4.2             | 2    | 2.2  | 2.4  | 3    | n.d.             | 2.3  | 1.5  | 1.3  | 1.7  | n.d.             | 2.7  | 0.9  | 0.8  | 0.6  |
| V261F | 47.7 | 59.1 | 57.1 | 68.3 | 69.2 | 49.7            | 44.3 | 49.3 | 66.2 | 64.4 | 29.8             | 36.5 | 41   | 41.9 | 46.2 | 25.4             | 33.7 | 33.6 | 28.5 | 32.8 |
| R278I | 60.9 | 68.3 | 68.8 | 68.5 | 71   | 46.8            | 57.8 | 56.5 | 55.3 | 59.9 | 34.6             | 34.5 | 33.6 | 30.3 | 31.4 | 20.5             | 20.6 | 22.3 | 17.8 | 20.4 |
| L435F | 18.6 | 21.6 | 17.9 | 23.3 | 32   | 21.5            | 19.3 | 19.2 | 21.4 | 25.1 | 13.1             | 9.5  | 12.2 | 18.9 | 11.9 | 8.9              | 5.2  | 11.7 | 7.3  | 8.5  |
| L166P | 19   | 30.1 | 32.9 | 26.6 | 35.5 | 17.3            | 23.6 | 23.3 | 20   | 22.1 | 10               | 14.2 | 13   | 10.9 | 14.7 | 6.5              | 9.6  | 7.5  | 6.6  | 8.8  |
| Y256S | 16.5 | 21.4 | 19.2 | 21.1 | 19.6 | 7.6             | 8    | 5.9  | 6.6  | 6.9  | 4.3              | 3.5  | 2.6  | 2.2  | 3.4  | 3.7              | 2.7  | n.d. | 0.8  | 1.9  |
| G382A | 15.7 | 11.2 | 11.8 | 10.6 | 11.6 | 2.9             | 2.5  | 2.1  | 1.8  | 1.9  | 1.6              | 1.1  | 0.7  | 0.4  | 0.7  | 1.6              | 1.5  | n.d. | 0.2  | 0.5  |

### C A $\beta$ 42 (% of total A $\beta$ )

|       | DMSO |      |      |      |      | 50 nM RO7019009 |      |      |      |      | 250 nM RO7019009 |      |      |      |      | 500 nM RO7019009 |      |      |      |      |
|-------|------|------|------|------|------|-----------------|------|------|------|------|------------------|------|------|------|------|------------------|------|------|------|------|
| WT    | 4.9  | 4.2  | 3.3  | 6.4  | 3.7  | 3               | 2.6  | 2.1  | 2.6  | 1.8  | 2.5              | 1.6  | 1.7  | 1    | 1    | n.d.             | 1.2  | 1.2  | 0.6  | 0.5  |
| M292D | 6.8  | 2.6  | 4.8  | 8.1  | 6    | 6.4             | 2.5  | 4.7  | 3.4  | 3.1  | 3.2              | 2.1  | 1.7  | 2.1  | 1.7  | 3.9              | 1.9  | 1.3  | 2.2  | 1.5  |
| V261F | 5.1  | 4.6  | 7.3  | 5.6  | 5.5  | 4.5             | 2.7  | 5.4  | 5.5  | 5.8  | 4.5              | 3.3  | 4.7  | 5.2  | 4.8  | 4                | 2.8  | 5.3  | 4.3  | 3.6  |
| R278I | 13.5 | 9.4  | 12   | 10.9 | 9.1  | 12.5            | 9.3  | 11.6 | 10.1 | 7.3  | 14.1             | 8    | 10.8 | 8.5  | 7.7  | 10.6             | 6.4  | 9.2  | 7    | 6.5  |
| L435F | 5.3  | 4.3  | 4    | 4.5  | 3.6  | 3.9             | 1.9  | 2.6  | 2.3  | 1.8  | 3.2              | 1.1  | 2    | 1.3  | 1    | 2.8              | n.d. | 1.6  | 0.8  | 1    |
| L166P | 27.7 | 25.9 | 31.6 | 32.6 | 24.5 | 32.5            | 26.3 | 31.9 | 34.1 | 29.3 | 28.7             | 25.8 | 30.8 | 28.8 | 31.7 | 23               | 23.3 | 26.6 | 28.4 | 26.7 |
| Y256S | 23.5 | 22.3 | 25.6 | 29.5 | 21.5 | 6.3             | 5.5  | 6.5  | 7.7  | 5.2  | 4.6              | 2.6  | 3.3  | 4.3  | 3.8  | 4.3              | 2.2  | 4    | 2.8  | 2.7  |
| G382A | 8.7  | 3.3  | 4.4  | 4.4  | 3.4  | 1.6             | 0.6  | 1.2  | 0.6  | 0.5  | 1                | 0.5  | 0.8  | 0.2  | 0.2  | 1.2              | 0.4  | 1.4  | 0.4  | 0.2  |
