# Supplementary material for: Aβ43‐producing PS1 FAD mutants cause altered substrate interactions and respond to γ‐secretase modulation
Source: PubMed Central journal article supplement (PMC6945062; doi:10.15252/embr.201947996), 2019-11-25
Supplement: EMBR-21-e47996-s008.pdf [file EMBR-21-e47996-s008.pdf]

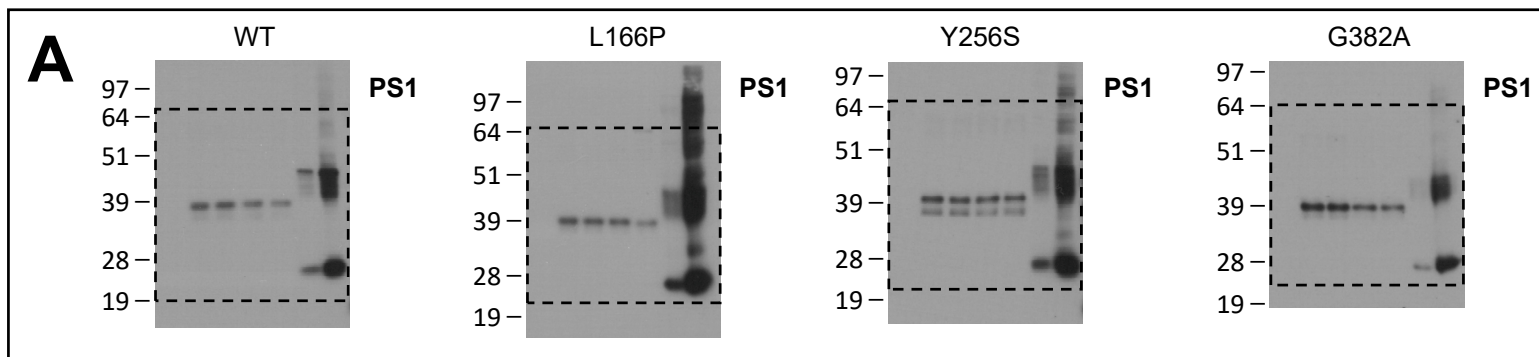

**B** V44 CL efficiency (Rel. to DMSO-treated)

|       | DMSO |   |   |   |   |   |   |   | 50 nM RO7019009 |      |      |      |      |      |      |      | 500 nM RO7019009 |      |      |      |      |      |      |      | 2500 nM RO7019009 |      |      |      |      |      |      |      |      |      |      |      |      |      |      |      |      |  |  |  |  |
|-------|------|---|---|---|---|---|---|---|-----------------|------|------|------|------|------|------|------|------------------|------|------|------|------|------|------|------|-------------------|------|------|------|------|------|------|------|------|------|------|------|------|------|------|------|------|--|--|--|--|
| WT    | 1    | 1 | 1 | 1 | 1 | 1 | 1 | 1 | 0.89            | 0.87 | 0.99 | 1.03 | 0.92 | 0.78 | 1.05 | 1.03 | 1.06             | 1.1  | 1.45 | 0.76 | 0.83 | 0.8  | 0.83 | 0.7  | 0.41              | 0.82 | 0.85 | 1    | 1.02 | 1.37 | 0.61 | 0.45 | 0.49 | 0.39 | 0.4  | 0.26 | 0.48 | 0.66 | 0.79 | 0.58 | 0.58 |  |  |  |  |
| L166P |      |   |   |   |   |   |   |   |                 |      |      |      |      |      |      |      |                  |      |      |      |      |      |      |      |                   |      |      |      |      |      |      |      |      |      |      |      |      |      |      |      |      |  |  |  |  |
| Y256S |      |   |   |   |   |   |   |   |                 |      |      |      |      |      |      |      |                  |      |      |      |      |      |      |      |                   |      |      |      |      |      |      |      |      |      |      |      |      |      |      |      |      |  |  |  |  |
| G382A | 1    | 1 | 1 | 1 | 1 | 1 | 1 | 1 | 0.89            | 0.98 | 1.06 | 1.29 | 1.22 | 0.94 | 0.64 | 0.79 | 0.93             | 0.74 | 1.11 | 0.83 | 1.06 | 0.89 | 0.91 | 0.76 | 0.81              | 0.67 | 0.6  | 0.91 | 0.78 | 1    | 0.49 | 0.9  | 0.52 | 0.66 | 0.59 |      |      |      |      |      |      |  |  |  |  |

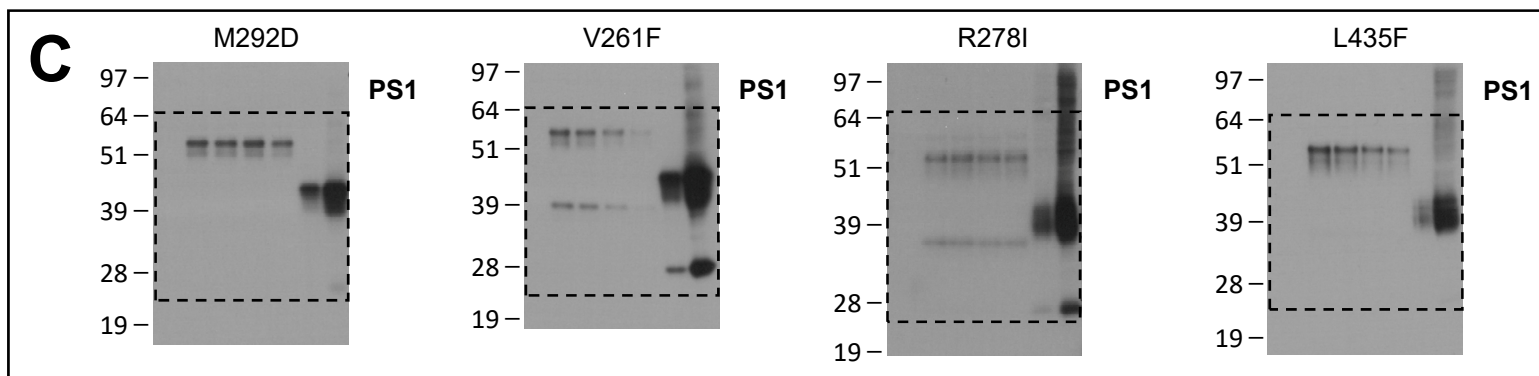

**D** V44 CL efficiency (Rel. to DMSO-treated)

|       | DMSO |   |   |   |   |   |   |   | 50 nM RO7019009 |      |      |      |      |      |      |      | 500 nM RO7019009 |      |      |      |      |      |      |      | 2500 nM RO7019009 |      |      |      |      |      |      |      |      |      |      |  |  |  |  |  |  |  |  |  |  |
|-------|------|---|---|---|---|---|---|---|-----------------|------|------|------|------|------|------|------|------------------|------|------|------|------|------|------|------|-------------------|------|------|------|------|------|------|------|------|------|------|--|--|--|--|--|--|--|--|--|--|
| M292D | 1    | 1 | 1 | 1 | 1 | 1 | 1 | 1 | 1.08            | 1.28 | 1.08 | 1.22 | 1.32 | 0.95 | 0.57 | 1.17 | 0.78             | 0.97 | 0.95 | 0.8  | 1.01 | 0.74 | 1.04 | 0.65 | 1.1               | 0.61 | 0.88 | 0.99 | 0.88 | 0.64 | 0.65 | 0.81 | 0.43 | 0.55 | 0.38 |  |  |  |  |  |  |  |  |  |  |
| V261F |      |   |   |   |   |   |   |   |                 |      |      |      |      |      |      |      |                  |      |      |      |      |      |      |      |                   |      |      |      |      |      |      |      |      |      |      |  |  |  |  |  |  |  |  |  |  |
| R278I |      |   |   |   |   |   |   |   |                 |      |      |      |      |      |      |      |                  |      |      |      |      |      |      |      |                   |      |      |      |      |      |      |      |      |      |      |  |  |  |  |  |  |  |  |  |  |
| L435F | 1    | 1 | 1 | 1 | 1 | 1 | 1 | 1 | 1               | 0.7  | 1.05 | 0.85 | 0.94 | 1.24 | 0.85 | 1.13 | 1.06             | 0.58 | 0.73 | 0.62 | 0.67 | 0.75 | 0.63 | 0.93 | 1.08              | 0.52 | 0.42 | 0.6  | 0.71 | 0.75 | 0.58 | 0.47 |      |      |      |  |  |  |  |  |  |  |  |  |  |
